# Supplementary material
Source: Springer Nature journal article supplement (https://www.springermedizin.de/resource/supplementary/12865_2008_237_MOESM1_ESM.pdf/9427578)

$\alpha$ -Tubulin

Merge

Nrg

Detail

Plasmatocyte

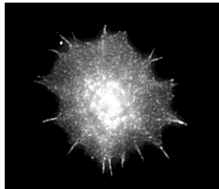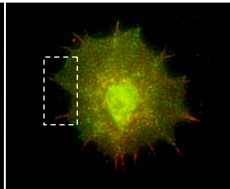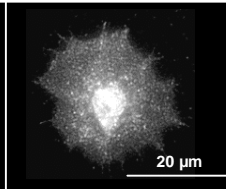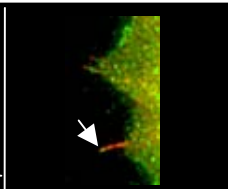

Lamellocyte

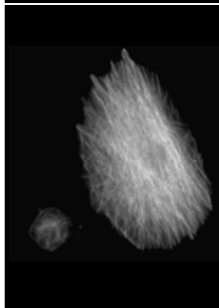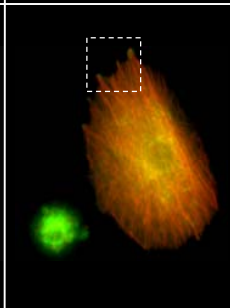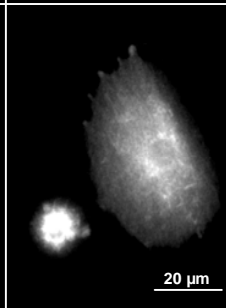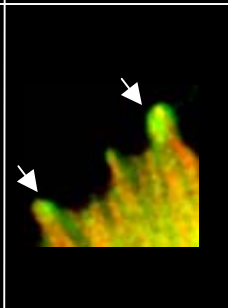

Red =  $\alpha$ -Tubulin Green = Nrg

Supplement: MOESM1 [file 9427578]
